# Supplementary material for: Time-resolved emission reductions for atmospheric chemistry modelling in Europe during the COVID-19 lockdowns
Source: Copernicus journal article supplement (doi:10.5194/acp-2020-686), 2020-07-22
Supplement: Supplementary file 1 [file acp-2020-686-supplement.zip]

## Sheet: Notes
Copernicus CAMS COVID-19 emission reduction factors
GNFR_A_PublicPower:
ENTSO-E transparency platform. "https://transparency.entsoe.eu/ Accessed: 2020/04/17"
ERA5 temperature. "https://confluence.ecmwf.int/display/CKB/ERA5+data+documentation Accessed:2020/04/17"
Machine Learning algorithm to derive Bussiness as Usual scenario
GNFR_B_Industry:
ENTSO-E transparency platform. "https://transparency.entsoe.eu/ Accessed: 2020/04/17"
ERA5 temperature. "https://confluence.ecmwf.int/display/CKB/ERA5+data+documentation Accessed:2020/04/17"
Machine Learning algorithm to derive Bussiness as Usual scenario
EUROSTAT energy balances. "https://ec.europa.eu/eurostat/web/energy/data/energy-balances Accessed:2020/04/17"
Assumed 25% of overall energy demand reduction is attributable to the industry sector for all countries
GNFR_F_RoadTransport:
Google LLC "Google COVID-19 Community Mobility Reports." https://www.google.com/covid19/mobility/ Accessed: 2020/05/01
GNFR_H_Aviation:
Flightradar24 airport statistics. "https://www.flightradar24.com/data/airports Accessed: 2020/05/01"
Eurostat airport statistics "https://data.europa.eu/euodp/en/data/dataset/43C6uGqWp92dX7vlgNzJA Accessed: 2020/04/17"
Other remarks:
Reduction factors are expressed as % of emission reduction compared to a baseline (pre-COVID19 situation)
Country codes are reported using ISO-2 codes
For those countries not included and that are part of the CAMS domain, it is recommened to apply the average reduction factor (expressed as ZZ in the tables)

## Sheet: GNFR_A_PublicPower
date	IT	ES	FR	DE	SE	NL	GB	AT	BE	BG	CZ	EE	GR	HR	HU	IE	LT	LV	PL	PT	RO	SI	SK	CH	RU	ZZ
2020-02-21	-3.54082	0	0	0	0	0	0	0	0	0	0	0	0	0	0	0	0	0	0	0	0	0	0	0	0	-0.141633
2020-02-22	-4.38692	0	0	0	0	0	0	0	0	0	0	0	0	0	0	0	0	0	0	0	0	0	0	0	0	-0.175477
2020-02-23	-3.85683	0	0	0	0	0	0	0	0	0	0	0	0	0	0	0	0	0	0	0	0	0	0	0	0	-0.154273
2020-02-24	-3.23507	0	0	0	0	0	0	0	0	0	0	0	0	0	0	0	0	0	0	0	0	0	0	0	0	-0.129403
2020-02-25	-2.99193	0	0	0	0	0	0	0	0	0	0	0	0	0	0	0	0	0	0	0	0	0	0	0	0	-0.119677
2020-02-26	-2.02063	0	0	0	0	0	0	0	0	0	0	0	0	0	0	0	0	0	0	0	0	0	0	0	0	-0.0808253
2020-02-27	-4.14731	0	0	0	0	0	0	0	0	0	0	0	0	0	0	0	0	0	0	0	0	0	0	0	0	-0.165892
2020-02-28	-3.60295	0	0	0	0	0	0	0	0	0	0	0	0	0	0	0	0	0	0	0	0	0	0	0	0	-0.144118
2020-02-29	-4.79444	0	0	0	0	0	0	0	0	0	0	0	0	0	0	0	0	0	0	0	0	0	0	0	0	-0.191778
2020-03-01	-2.41759	0	0	0	0	0	0	0	0	0	0	0	0	0	0	0	0	0	0	0	0	0	0	0	0	-0.0967034
2020-03-02	-0.260904	0	0	0	0	0	0	0	0	0	0	0	0	0	0	0	0	0	0	0	0	0	0	0	0	-0.0104362
2020-03-03	-1.08421	0	0	0	0	0	0	0	0	0	0	0	0	0	0	0	0	0	0	0	0	0	0	0	0	-0.0433682
2020-03-04	-3.77725	0	0	0	0	0	0	0	0	0	0	0	0	0	0	0	0	0	0	0	0	0	0	0	0	-0.15109
2020-03-05	-3.44775	0	0	0	0	0	0	0	0	0	0	0	0	0	0	0	0	0	0	0	0	0	0	0	0	-0.13791
2020-03-06	-1.84427	0	0	0	0	0	0	0	0	0	0	0	0	0	0	0	0	0	0	0	0	0	0	0	0	-0.0737707
2020-03-07	-2.23949	0	0	0	0	0	0	0	0	0	0	0	0	0	0	0	0	0	0	0	0	0	0	0	0	-0.0895796
2020-03-08	-2.92462	0	0	0	0	0	0	0	0	0	0	0	0	0	0	0	0	0	0	0	0	0	0	0	0	-0.116985
2020-03-09	-5.6433	0	0	0	0	0	0	0	0	0	0	0	0	0	0	0	0	0	0	0	0	0	0	0	0	-0.225732
2020-03-10	-4.0956	0	0	0	0	0	0	0	0	0	0	0	0	0	0	0	0	0	0	0	0	0	0	0	0	-0.163824
2020-03-11	-5.59959	0	0	0	0.8298	0	0	0	0	0	0	0	0	0	0	0	0	0	0	0	0	0	0	0	0	-0.190791
2020-03-12	-8.44272	0	0	0	1.6852	0	0	0	0	0	0	0	0	0	0	0	0	0	0	0	0	0	0	0	0	-0.270301
2020-03-13	-12.0966	0	0	0	3.04037	0	0	-3.70844	0	0	0	0	0	0	0	0	0	-1.71177	0	0	0	0	0	-0.337181	0	-0.592544
2020-03-14	-11.068	-2.09985	0	0	5.52864	0	0	-4.30417	0	0	0	0	0	0	0	0	0	-1.33998	0	0	0	0	0	-4.04016	0	-0.692942
2020-03-15	-11.9925	-2.71974	0	0	6.99552	0	0	-5.45137	0	0	0	0	0	0	0	0	0	-3.57658	0	0	0	0	-8.34027	-1.55993	0	-1.0658
2020-03-16	-17.7076	-7.38568	0	0	5.96038	0	0	-5.17301	0	0	-0.694638	0	0	0	1.40885	0	0	-1.35641	0	0	0	-7.09116	-4.13235	-1.3075	0	-1.49916
2020-03-17	-18.443	-4.43778	-5.14717	0	2.4539	0	0	-6.03875	-8.98608	0	-0.345958	0	-10.7973	0	-0.152312	0	0	-2.85601	0	0	0	-6.39702	-4.14747	-3.06989	0	-2.73459
2020-03-18	-18.7847	-4.81925	-13.3545	0	2.27734	0	0	-5.96319	-12.0542	0	-1.53218	0	-8.50108	0	-1.04141	0	0	-0.950785	0	0	0	-9.95247	-5.47614	-6.80924	0	-3.47847
2020-03-19	-20.4736	-12.1749	-17.0953	0	1.50192	0	0	-8.76902	-9.42856	0	-4.30921	0	-10.1871	-6.57551	-1.61088	0	0	-5.55708	0	-4.18878	0	-11.7602	-7.328	-10.3999	0	-5.13424
2020-03-20	-21.3974	-12.8364	-18.8175	-5.7701	-0.985694	0	0	-9.62077	-13.6575	2.14246	-4.82713	0	-8.06638	-6.83708	-2.86036	0	0	-4.11164	0	-7.52843	0	-12.4531	-7.99997	-10.9513	0	-5.86313
2020-03-21	-19.5179	-8.04385	-14.6266	-1.63418	-1.27295	0	0	-8.45631	-16.376	-1.70588	-7.31069	0	-6.48003	-4.72978	-2.8018	0	0	-4.0048	0	-8.09093	0	-10.058	-7.45507	-1.74782	0	-4.9725
2020-03-22	-15.0224	-7.56752	-11.4578	-3.13448	0.968076	0	0	-9.13391	-16.3576	-2.98936	-10.2309	0	-0.0147169	-9.74402	-4.2585	0	0	-2.85513	0	-5.22643	0	-12.2963	-9.97325	-2.76044	0	-4.88218
2020-03-23	-26.8187	-11.6786	-17.2176	-8.0921	0.894037	-7.4538	-2.64062	-14.3183	-16.0318	-5.08555	-9.29135	0	-5.17578	-14.0924	-4.07704	0	0	-4.61387	0	-6.31697	-8.16655	-13.6306	-11.9535	-0.972327	0	-7.46934
2020-03-24	-28.3002	-10.3269	-16.9089	-8.21938	2.73253	-6.96808	-6.73918	-16.5051	-14.7223	-1.68876	-8.71376	0	-9.31968	-10.7906	-6.01898	0	-6.90459	-3.96465	-9.81532	-9.68278	-8.38707	-10.1457	-11.9381	-7.93275	0	-8.45041
2020-03-25	-28.9845	-10.8115	-19.3612	-7.76333	1.69008	-8.36799	-12.1809	-15.1195	-15.6941	-1.69553	-9.54884	0	-8.69978	-10.0453	-4.9427	0	-7.46792	-3.46586	-11.0892	-12.1013	-10.0934	-6.86724	-11.1657	-7.33482	0	-8.84442
2020-03-26	-28.895	-12.9728	-18.323	-8.19755	0.0306392	-8.34031	-13.7365	-13.8243	-17.5593	2.32066	-6.48191	0	-6.66156	-4.15304	-1.74935	0	-8.902	-4.6517	-7.96206	-11.7528	-5.53292	-3.6705	-7.25816	-8.00767	0	-7.85125
2020-03-27	-28.2914	-12.9189	-14.8671	-7.84436	1.22953	-6.14544	-13.2425	-11.0473	-16.4932	3.39622	-5.87976	0	-2.17513	-3.65604	-6.59081	0	-9.83522	-2.71652	-8.42244	-13.5638	-9.10568	-7.83185	-9.67714	-8.40938	0	-7.76353
2020-03-28	-21.468	-9.04998	-10.4739	-2.39953	2.17339	-1.76555	-14.1086	-7.26052	-14.157	0.488166	-4.99994	0	-2.27916	-5.07875	-6.04396	-3.73023	-8.79652	-2.04212	-7.9065	-9.78302	-10.4305	-9.79234	-8.73562	-2.86668	0	-6.42027
2020-03-29	-14.0978	-9.87264	-10.4505	2.74735	0.290592	3.26166	-11.3264	-3.30149	-11.5827	0.22924	-6.55316	0	NA	-4.25317	-6.36821	-3.71551	-9.32065	-3.91563	-6.8657	-7.78933	-10.0994	-6.70038	-6.99607	-1.17253	0	-5.32719
2020-03-30	-25.6713	-19.6628	-11.9583	-7.94219	1.02599	-2.58865	-5.08023	-12.2782	-11.6495	-3.9954	-12.2269	-3.60006	-9.87925	-10.4062	-7.15473	-6.35685	-10.2922	-4.98669	-10.7762	-11.4609	-13.0432	-9.88965	-14.2109	-5.35254	-3.99325	-9.33721
2020-03-31	-28.5408	-20.4498	-9.95718	-9.79161	0.250962	-7.7113	-7.25533	-13.9926	-15.0746	-6.37516	-12.2879	-3.46597	-9.69836	-12.7895	-13.7778	-7.74456	-9.33341	-5.49319	-10.1865	-10.3702	-13.2641	-10.3365	-13.9818	-4.96174	-5.15688	-10.4698
2020-04-01	-27.8926	-16.3756	-11.5266	-7.4523	1.63116	-4.14283	-7.37554	-13.312	-17.4691	-4.84203	-11.7227	-3.23493	-8.09993	-12.6525	-13.2001	-7.59157	-6.93581	-3.19527	-12.2246	-9.71076	-14.0432	-8.85993	-14.3931	-4.95196	-6.78003	-9.85415
2020-04-02	-29.6091	-19.0713	-12.139	-6.12806	2.04781	-2.61875	-11.5749	-12.44	-16.4924	-4.04367	-8.05814	-2.18779	-12.7176	-11.4239	-11.1317	-7.31071	-6.92922	-2.62029	-8.73066	-12.0404	-12.0657	-10.1208	-12.492	-8.46819	-5.97626	-9.77371
2020-04-03	-28.7345	-20.9257	-11.8678	-6.10955	4.58759	-2.59451	-11.2678	-8.5389	-17.0477	-2.59104	-6.22225	-2.40053	-8.08541	-8.27969	-8.64859	-9.00081	-9.2922	-4.22348	-9.0736	-10.7685	-11.5261	-12.4553	-11.349	-8.68984	-5.00001	-9.20421
2020-04-04	-20.619	-16.8513	-11.2045	-6.25693	4.24576	-3.43781	-8.36038	-9.09534	-13.4115	1.15763	-6.91893	-3.8276	-6.32383	-6.85717	-8.77341	-6.509	-9.6356	-3.64116	-9.17981	-6.83842	-9.66777	-11.2314	-10.7999	-5.70636	-3.65177	-7.73582
2020-04-05	-17.3964	-14.0005	-11.7716	-2.16965	4.61385	-1.67568	-18.5828	-2.60826	-14.4659	5.6499	-4.96321	-3.78201	-7.4102	-4.97086	-6.74854	-1.96946	-8.40653	-3.65924	-7.97547	-1.21884	-9.31026	-7.84479	-10.247	4.68991	-3.70305	-5.99707
2020-04-06	-26.6276	-18.3885	-15.6219	-6.99877	-0.063687	-2.4661	-16.3221	-5.52024	-18.3316	0.769951	-8.43822	-2.4219	-8.2386	-12.5006	-10.0031	-9.90712	-9.23067	-4.38139	-9.65103	-7.32941	-14.2617	-15.4209	-10.9198	-4.62461	-4.89693	-9.67187
2020-04-07	-27.0162	-21.6054	-15.2519	-10.1646	-2.33695	-5.20763	-15.3503	-12.0888	-19.1974	-3.46705	-9.6623	-3.78858	-8.57716	-13.8121	-10.3776	-11.3285	-10.1572	-5.06681	-10.4721	-10.1875	-15.0084	-16.2898	-12.6822	-7.6093	-4.39506	-11.244
2020-04-08	-26.607	-22.8314	-17.2587	-11.7341	-1.80138	-4.74246	-13.2636	-13.1957	-16.8691	-6.2496	-10.7956	-7.40728	-9.64228	-14.1537	-11.7766	-9.68693	-11.1094	-6.02851	-11.2189	-11.6684	-15.309	-16.6684	-14.0899	-11.9673	-3.10339	-11.9671
2020-04-09	-27.4506	-24.9604	-19.4163	-13.1987	-5.32155	-5.70557	-13.8301	-12.5402	-17.2541	-5.3078	-13.6454	-8.27605	-11.2602	-14.9641	-13.5163	-10.9824	-12.6611	-5.65965	-13.4948	-11.6529	-14.4822	-16.7676	-15.37	-12.6412	-3.22205	-12.9432
2020-04-10	-28.1821	-13.3948	-20.1968	-9.73269	-4.95774	-2.99946	-7.9267	-12.0046	-18.4631	0.774194	-13.2057	-7.57288	-12.7414	-14.7284	-8.16773	-10.083	-11.3298	-5.24649	-15.1672	-10.2268	-14.3552	-15.3528	-15.4967	-11.2632	-3.45948	-11.4192
2020-04-11	-21.9936	-19.5726	-17.531	-13.4085	-2.79413	-3.45935	-12.9254	-11.0509	-15.7871	-5.45577	-15.4609	-3.82082	-8.39519	-11.6682	-14.7138	-8.94918	-11.5215	-6.73308	-14.5496	-14.3939	-14.4229	-15.8733	-19.5558	-9.12679	-2.45505	-11.8247
2020-04-12	-16.4969	-17.4091	-15.4786	-6.44097	2.12178	0.222314	-8.36198	-8.18621	-9.21577	-8.03565	-13.1454	2.27178	-8.88844	-13.4651	-7.18944	-7.64878	-5.67419	-1.81808	-6.03174	-12.4415	-10.842	-8.81793	-17.854	-4.0968	-2.38252	-8.21221
2020-04-13	-15.1084	-23.6208	-18.6544	-4.40106	-0.051423	1.40534	-20.5842	-5.67587	-14.8356	-1.59394	-11.0358	-5.64743	-16.6774	-14.8841	-7.3697	-10.2975	-9.91622	-4.13308	-9.48238	-21.6909	-10.5939	-11.9373	-12.1065	-3.55801	-2.80185	-10.2101
2020-04-14	-27.4177	-18.3823	-22.6613	-16.2258	-2.3147	0.182544	-18.1601	-15.9334	-13.889	-4.80677	-17.1723	-5.22192	-14.4632	-18.154	-14.1096	-13.9662	-14.8384	-5.3254	-17.3869	-15.1877	-13.4842	-16.667	-19.6944	-11.6085	-2.48792	-13.575
2020-04-15	-26.5258	-15.8964	-18.3408	-13.2422	-0.75574	-5.96664	-16.2436	-11.3586	-12.7245	-16.6283	-12.3077	-3.40046	-15.9918	-16.6794	-11.8405	-12.8502	-10.7787	-4.69038	-12.2171	-14.4848	-17.1542	-17.0782	-13.5731	-8.27197	-2.08367	-12.4434
2020-04-16	-25.1774	-12.9974	-15.2023	-11.1408	-3.96425	-6.36458	-13.4558	-11.2177	-12.4695	-18.3497	-11.8448	-1.8711	-18.1071	-15.3971	-11.9985	-12.4668	-11.9233	-3.95585	-10.8367	-10.5326	-16.755	-16.1063	-12.5548	-10.0627	-1.26485	-11.8407
2020-04-17	-22.0982	-12.5003	-15.6885	-11.6583	-2.49176	-6.8763	-19.6653	-8.41906	-14.6346	-18.1196	-12.3888	-4.63428	-14.5484	-13.6118	-11.5758	-12.0136	-12.3993	-5.39886	-12.1441	-11.9228	-11.1187	-14.3345	-11.6284	-10.7191	-1.61801	-11.6883
2020-04-18	-14.0058	-8.59307	-13.8453	-3.6655	-0.374012	1.27842	-11.1469	-8.10037	-9.71232	-5.83643	-8.74925	-0.21629	-9.77687	-12.5995	-8.89044	-8.57591	-9.85396	-3.79669	-9.73315	-10.3999	-13.8839	-13.7931	-6.77323	-8.56722	-0.600066	-8.00843
2020-04-19	-14.1165	-8.14253	-11.0353	-1.05179	-1.30712	-11.6382	-13.6194	-6.08216	-11.1341	-9.41246	-9.81724	-2.00086	-3.40901	-10.1954	-5.17054	-4.6492	-9.80537	-3.53413	-8.18873	-10.5234	-13.5869	-11.8876	-8.82542	2.00669	-2.15617	-7.57132
2020-04-20	-13.8477	-11.4987	-12.5587	-6.63357	-0.252758	-31.5481	-25.3931	-11.6043	-17.1361	-21.9421	-12.2761	-1.08599	-7.73938	-13.8293	-11.8829	-10.7472	-9.69258	-2.69713	-9.80939	-10.2925	-21.4166	-16.5113	-13.8179	2.82897	-2.81908	-11.7681
2020-04-21	-12.9079	-12.9185	-12.5286	-6.37776	-0.347981	-31.201	-23.1685	-13.5812	-16.5418	-14.7838	-10.4109	-3.87911	-21.9533	-14.345	-11.4099	-9.17611	-9.04344	-4.56177	-7.58527	-7.95251	-23.1006	-17.0546	-13.2543	5.85246	-2.43207	-11.7865
2020-04-22	-14.0791	-12.4498	-11.9	-6.66935	-1.18042	-28.4757	-18.2701	-11.7074	-11.1283	-14.5991	-12.053	-5.63126	-20.2548	-16.2228	-11.005	-8.55874	-9.46144	-5.25083	-8.53351	-9.88432	-18.5744	-17.4374	-12.9806	-3.34188	-3.08057	-11.7092
2020-04-23	-15.6966	-12.6247	-10.8271	-8.16148	-1.79008	-23.4804	-12.6889	-12.7111	-9.10411	-14.3482	-12.9635	-6.60898	-21.4401	-17.0059	-10.6311	-8.33182	-10.2363	-5.74303	-9.22218	-11.4874	-21.8172	-18.2349	-12.6805	-9.99894	-3.78101	-12.0646
2020-04-24	-12.3361	-13.2747	-11.7271	-9.36051	-3.70821	-25.1135	-14.1093	-11.3606	-11.955	-12.366	-12.6488	-2.14082	-19.1518	-16.2709	-11.2092	-7.85878	-10.4449	-6.62039	-9.47353	-11.1742	-20.3239	-17.7691	-12.7319	-8.09392	-3.16633	-11.7756
2020-04-25	-3.98012	-10.1834	-10.9207	-6.0549	-6.14081	-21.3582	-11.8028	-10.6832	-9.93266	-7.08249	-13.22	-1.3321	-18.1848	-14.7514	-9.8923	-7.18071	-11.9191	-6.58422	-10.1457	-4.5977	-11.6459	-18.8158	-11.8689	-3.20422	-0.950575	-9.69731
2020-04-26	-7.01091	-8.57631	-8.46252	-4.33793	-4.4462	-25.4754	-7.05259	-12.0779	-10.3125	3.3137	-10.4459	-1.6878	-12.6762	-12.8978	-12.2787	-4.82473	-10.8707	-4.22948	-8.54471	-7.24322	-10.2528	-19.0846	-13.0773	-2.09193	-0.417069	-8.60246

## Sheet: GNFR_B_Industry
date	IT	ES	FR	DE	GB	SE	NL	AT	BE	BG	CZ	EE	GR	HR	HU	IE	LT	LV	PL	PT	RO	SI	SK	CH	RU	ZZ
2020-02-21	-2.23537	0	0	0	0	0	0	0	0	0	0	0	0	0	0	0	0	0	0	0	0	0	0	0	0	-0.0894146
2020-02-22	-2.76952	0	0	0	0	0	0	0	0	0	0	0	0	0	0	0	0	0	0	0	0	0	0	0	0	-0.110781
2020-02-23	-2.43487	0	0	0	0	0	0	0	0	0	0	0	0	0	0	0	0	0	0	0	0	0	0	0	0	-0.0973947
2020-02-24	-2.04234	0	0	0	0	0	0	0	0	0	0	0	0	0	0	0	0	0	0	0	0	0	0	0	0	-0.0816936
2020-02-25	-1.88885	0	0	0	0	0	0	0	0	0	0	0	0	0	0	0	0	0	0	0	0	0	0	0	0	-0.0755539
2020-02-26	-1.27565	0	0	0	0	0	0	0	0	0	0	0	0	0	0	0	0	0	0	0	0	0	0	0	0	-0.0510261
2020-02-27	-2.61825	0	0	0	0	0	0	0	0	0	0	0	0	0	0	0	0	0	0	0	0	0	0	0	0	-0.10473
2020-02-28	-2.27459	0	0	0	0	0	0	0	0	0	0	0	0	0	0	0	0	0	0	0	0	0	0	0	0	-0.0909836
2020-02-29	-3.02679	0	0	0	0	0	0	0	0	0	0	0	0	0	0	0	0	0	0	0	0	0	0	0	0	-0.121072
2020-03-01	-1.52625	0	0	0	0	0	0	0	0	0	0	0	0	0	0	0	0	0	0	0	0	0	0	0	0	-0.0610501
2020-03-02	-0.164712	0	0	0	0	0	0	0	0	0	0	0	0	0	0	0	0	0	0	0	0	0	0	0	0	-0.00658849
2020-03-03	-0.684473	0	0	0	0	0	0	0	0	0	0	0	0	0	0	0	0	0	0	0	0	0	0	0	0	-0.0273789
2020-03-04	-2.38463	0	0	0	0	0	0	0	0	0	0	0	0	0	0	0	0	0	0	0	0	0	0	0	0	-0.0953851
2020-03-05	-2.17661	0	0	0	0	0	0	0	0	0	0	0	0	0	0	0	0	0	0	0	0	0	0	0	0	-0.0870645
2020-03-06	-1.16431	0	0	0	0	0	0	0	0	0	0	0	0	0	0	0	0	0	0	0	0	0	0	0	0	-0.0465724
2020-03-07	-1.41382	0	0	0	0	0	0	0	0	0	0	0	0	0	0	0	0	0	0	0	0	0	0	0	0	-0.0565528
2020-03-08	-1.84635	0	0	0	0	0	0	0	0	0	0	0	0	0	0	0	0	0	0	0	0	0	0	0	0	-0.073854
2020-03-09	-3.56269	0	0	0	0	0	0	0	0	0	0	0	0	0	0	0	0	0	0	0	0	0	0	0	0	-0.142507
2020-03-10	-2.58561	0	0	0	0	0	0	0	0	0	0	0	0	0	0	0	0	0	0	0	0	0	0	0	0	-0.103424
2020-03-11	-3.53509	0	0	0	0	0	0	0	0	0	0	0	0	0	0	0	0	0	0	0	0	0	0	0	0	-0.141404
2020-03-12	-5.33	0	0	0	0	0	0	0	0	0	0	0	0	0	0	0	0	0	0	0	0	0	0	0	0	-0.2132
2020-03-13	-7.63672	0	0	0	0	0	0	-2.0376	0	0	0	0	0	0	0	0	0	-1.55052	0	0	0	0	0	-0.2298	0	-0.458186
2020-03-14	-6.98739	-1.58121	0	0	0	0	0	-2.36493	0	0	0	0	0	0	0	0	0	-1.21375	0	0	0	0	0	-2.7535	0	-0.596031
2020-03-15	-7.57105	-2.048	0	0	0	0	0	-2.99526	0	0	0	0	0	0	0	0	0	-3.23966	0	0	0	0	-4.22935	-1.06314	0	-0.845858
2020-03-16	-11.179	-5.56151	0	0	0	0	0	-2.84231	0	0	-0.41645	0	0	0	0	0	0	-1.22863	0	0	0	-3.55269	-2.09551	-0.891103	0	-1.11069
2020-03-17	-11.6433	-3.3417	-4.56309	0	0	0	0	-3.318	-4.77983	0	-0.207409	0	-10.7543	0	-0.0867382	0	0	-2.58696	0	0	0	-3.20492	-2.10318	-2.09223	0	-1.94726
2020-03-18	-11.859	-3.62895	-11.8391	0	0	0	0	-3.27648	-6.41181	0	-0.918575	0	-8.46721	0	-0.593059	0	0	-0.861218	0	0	0	-4.98621	-2.77695	-4.64072	0	-2.41037
2020-03-19	-12.9253	-9.16781	-15.1554	0	0	0	0	-4.81814	-5.01519	0	-2.58346	0	-10.1466	-7.20998	-0.917359	0	0	-5.03359	0	-3.06197	0	-5.89188	-3.71602	-7.08785	0	-3.70922
2020-03-20	-13.5084	-9.66595	-16.6822	-3.21275	0	-0.619154	0	-5.28614	-7.26465	0	-2.89396	0	-8.03424	-7.4968	-1.62891	0	0	-3.72431	0	-5.50324	0	-6.23904	-4.05678	-7.46363	0	-4.13121
2020-03-21	-12.3219	-6.05711	-12.9668	-0.909898	0	-0.799591	0	-4.64633	-8.71064	-1.29234	-4.38291	0	-6.45422	-5.18616	-1.59556	0	0	-3.62754	0	-5.91442	0	-5.03909	-3.78046	-1.1912	0	-3.39505
2020-03-22	-9.48382	-5.69843	-10.1576	-1.74525	0	0	0	-5.01863	-8.70086	-2.26467	-6.13362	0	-0.0146582	-10.6842	-2.42511	0	0	-2.58617	0	-3.82049	0	-6.16047	-5.05743	-1.88133	0	-3.27331
2020-03-23	-16.931	-8.7941	-15.2639	-4.50562	-2.12269	0	-5.57919	-7.86722	-8.52756	-3.85269	-5.57036	0	-5.15516	-15.4522	-2.32178	0	0	-4.17923	0	-4.61767	-4.18368	-6.82897	-6.06161	-0.662673	0	-5.13909
2020-03-24	-17.8663	-7.7763	-14.9902	-4.57649	-5.41735	0	-5.21563	-9.06874	-7.83103	-1.27936	-5.22408	0	-9.28255	-11.8318	-3.42767	0	-4.87613	-3.59117	-6.10405	-7.07806	-4.29666	-5.083	-6.05379	-5.40643	0	-5.85107
2020-03-25	-18.2983	-8.14118	-17.1642	-4.32257	-9.79169	0	-6.26346	-8.3074	-8.34792	-1.28449	-5.72472	0	-8.66511	-11.0146	-2.81475	0	-5.27396	-3.13937	-6.89625	-8.846	-5.17081	-3.4405	-5.66211	-4.99891	0	-6.14273
2020-03-26	-18.2418	-9.76868	-16.2438	-4.56434	-11.0422	0	-6.24275	-7.59579	-9.34005	0	-3.88604	0	-6.63502	-4.55377	-0.996214	0	-6.28673	-4.21349	-4.95153	-8.59123	-2.83449	-1.83893	-3.68061	-5.45748	0	-5.4786
2020-03-27	-17.8607	-9.72806	-13.1801	-4.36768	-10.6451	0	-4.59988	-6.06994	-8.77296	0	-3.52503	0	-2.16646	-4.00882	-3.75331	0	-6.94578	-2.46061	-5.23783	-9.91506	-4.66479	-3.92377	-4.90727	-5.73127	0	-5.29858
2020-03-28	-13.5531	-6.81474	-9.28535	-1.33604	-11.3413	0	-1.32152	-3.9893	-7.5303	0	-2.99757	0	-2.27008	-5.5688	-3.44189	-2.32558	-6.21223	-1.84974	-4.91698	-7.15133	-5.3435	-4.90598	-4.42983	-1.95373	0	-4.34155
2020-03-29	-8.90012	-7.43421	-9.26462	0	-9.10486	0	0	-1.814	-6.16104	0	-3.92875	0	-6.05499	-4.66356	-3.62655	-2.31641	-6.58238	-3.54677	-4.26972	-5.69396	-5.17388	-3.3569	-3.5477	-0.799116	0	-3.84958
2020-03-30	-16.2066	-14.8063	-10.6013	-4.42215	-4.08379	0	-1.93761	-6.74625	-6.19655	-3.02682	-7.3303	-2.80378	-9.83989	-11.4103	-4.07445	-3.96312	-7.26852	-4.51693	-6.70162	-8.37789	-6.68195	-4.95473	-7.20636	-3.64793	-2.72153	-6.38107
2020-03-31	-18.0182	-15.3989	-8.82728	-5.4519	-5.83226	0	-5.77193	-7.68822	-8.01843	-4.82967	-7.36686	-2.69935	-9.65972	-14.0236	-7.84613	-4.82828	-6.59139	-4.97572	-6.33492	-7.58055	-6.79511	-5.17862	-7.09017	-3.38158	-3.51458	-7.10813
2020-04-01	-17.609	-12.331	-10.2186	-4.14939	-5.92889	0	-3.10092	-7.31427	-9.29206	-3.66821	-7.028	-2.51941	-8.06766	-13.8734	-7.51714	-4.7329	-4.89817	-2.89427	-7.60238	-7.09851	-7.19428	-4.43884	-7.29873	-3.37492	-4.62081	-6.67087
2020-04-02	-18.6926	-14.3609	-10.7615	-3.41206	-9.30462	0	-1.96014	-6.83517	-8.77256	-3.06339	-4.83102	-1.70389	-12.6669	-12.5262	-6.33921	-4.5578	-4.89352	-2.37345	-5.42952	-8.80143	-6.18122	-5.07055	-6.3347	-5.77135	-4.07301	-6.74867
2020-04-03	-18.1405	-15.7573	-10.5211	-3.40175	-9.05769	0	-1.942	-4.6917	-9.06795	-1.96291	-3.73037	-1.86957	-8.0532	-9.07861	-4.92516	-5.61148	-6.56229	-3.82562	-5.64279	-7.87168	-5.90475	-6.24015	-5.75507	-5.92241	-3.40767	-6.35775
2020-04-04	-13.017	-12.6892	-9.93303	-3.48381	-6.72056	0	-2.57321	-4.99744	-7.13379	0	-4.14804	-2.981	-6.29863	-7.51882	-4.99625	-4.05798	-6.8048	-3.29815	-5.70884	-4.99884	-4.95275	-5.62698	-5.47665	-3.88907	-2.4888	-5.35175
2020-04-05	-10.9826	-10.5426	-10.4358	-1.20804	-14.938	0	-1.25425	-1.43311	-7.69461	0	-2.97555	-2.94549	-7.38068	-5.45051	-3.84313	-1.22784	-5.93682	-3.31453	-4.95987	-0.890968	-4.7696	-3.93025	-5.19624	0	-2.52375	-4.55337
2020-04-06	-16.8104	-13.8468	-13.8492	-3.89687	-13.1207	-0.0400044	-1.84588	-3.0331	-9.75087	0	-5.05889	-1.88621	-8.20578	-13.7068	-5.69655	-6.17651	-6.51883	-3.96865	-6.00188	-5.35776	-7.30618	-7.7259	-5.53744	-3.15182	-3.33742	-6.63321
2020-04-07	-17.0557	-16.2691	-13.5212	-5.65958	-12.3395	-1.46793	-3.89793	-6.64217	-10.2114	-2.62656	-5.79274	-2.95061	-8.54299	-15.1448	-5.90979	-7.06268	-7.17317	-4.5895	-6.51253	-7.44698	-7.68874	-8.16122	-6.43112	-5.18599	-2.99537	-7.65117
2020-04-08	-16.7974	-17.1923	-15.3002	-6.53345	-10.6621	-1.13152	-3.54974	-7.25041	-8.97291	-4.73454	-6.47215	-5.76891	-9.60386	-15.5194	-6.70648	-6.03923	-7.84563	-5.46061	-6.97695	-8.52955	-7.84274	-8.35092	-7.14496	-8.15609	-2.11506	-8.18629
2020-04-09	-17.3299	-18.7955	-17.213	-7.34895	-11.1174	-3.34268	-4.27064	-6.8902	-9.17769	-4.02106	-8.18068	-6.44552	-11.2153	-16.408	-7.6972	-6.8469	-8.94146	-5.1265	-8.39231	-8.51818	-7.41917	-8.40058	-7.79412	-8.61536	-2.19593	-8.86817
2020-04-10	-17.7917	-10.0864	-17.905	-5.41909	-6.37195	-3.11416	-2.24511	-6.59591	-9.82082	0	-7.91711	-5.89788	-12.6906	-16.1496	-4.65133	-6.28617	-8.00124	-4.75226	-9.43231	-7.47576	-7.35411	-7.6918	-7.85839	-7.67622	-2.35775	-7.82171
2020-04-11	-13.8849	-14.7384	-15.5416	-7.46575	-10.3902	-1.75511	-2.58933	-6.07192	-8.39742	-4.13316	-9.26913	-2.97572	-8.36174	-12.7941	-8.37918	-5.57929	-8.13664	-6.0988	-9.04823	-10.5219	-7.38877	-7.95254	-9.91672	-6.2202	-1.6732	-7.97135
2020-04-12	-10.4147	-13.1092	-13.7221	-3.58629	-6.72185	0	0	-4.49792	-4.90201	-6.08761	-7.88091	0	-8.85303	-14.7643	-4.09422	-4.76856	-4.0072	-1.64681	-3.75108	-9.09465	-5.55432	-4.4178	-9.05375	-2.7921	-1.62376	-5.81377
2020-04-13	-9.53816	-17.7867	-16.5376	-2.45048	-16.5468	-0.0323009	0	-3.11861	-7.89127	-1.20753	-6.61617	-4.39831	-16.611	-16.3203	-4.19687	-6.41988	-7.00298	-3.74373	-5.897	-15.8559	-5.4272	-5.98061	-6.13918	-2.4249	-1.90955	-7.36212
2020-04-14	-17.3091	-13.8421	-20.0898	-9.03442	-14.5982	-1.45396	0	-8.75462	-7.38776	-3.64149	-10.2951	-4.06692	-14.4055	-19.9057	-8.03506	-8.70713	-10.4791	-4.82373	-10.8128	-11.1021	-6.9079	-8.35019	-9.987	-7.91158	-1.6956	-9.34388
2020-04-15	-16.7461	-11.9702	-16.2596	-7.37315	-13.0576	-0.474711	-4.46604	-6.24099	-6.76835	-12.5972	-7.37873	-2.64834	-15.9281	-18.2888	-6.74289	-8.01134	-7.6121	-4.24853	-7.59773	-10.5883	-8.78802	-8.5562	-6.8829	-5.63761	-1.42009	-8.65134
2020-04-16	-15.8948	-9.78718	-13.4772	-6.20312	-10.8166	-2.49011	-4.76391	-6.1636	-6.63271	-13.9013	-7.10118	-1.45725	-18.035	-16.8828	-6.83285	-7.77233	-8.42043	-3.5832	-6.73922	-7.69924	-8.58351	-8.06929	-6.36655	-6.85802	-0.862039	-8.21574
2020-04-17	-13.9509	-9.41288	-13.9083	-6.49125	-15.8081	-1.56518	-5.14693	-4.62586	-7.78435	-13.7269	-7.42733	-3.60926	-14.4904	-14.9252	-6.59216	-7.48976	-8.75654	-4.89027	-7.5523	-8.71549	-5.69606	-7.18162	-5.89676	-7.30541	-1.10273	-8.16208
2020-04-18	-8.84207	-6.47068	-12.2742	-2.04092	-8.96053	-0.234932	0	-4.45075	-5.16613	-4.42154	-5.24535	-0.16845	-9.73792	-13.8152	-5.06289	-5.34658	-6.95901	-3.43903	-6.05296	-7.60224	-7.11268	-6.91036	-3.4347	-5.83884	-0.408964	-5.59988
2020-04-19	-8.91195	-6.13142	-9.78308	-0.585632	-10.948	-0.821054	-8.71121	-3.34184	-5.92242	-7.13065	-5.88563	-1.5583	-3.39543	-11.1792	-2.9445	-2.8985	-6.92469	-3.2012	-5.09249	-7.69256	-6.9605	-5.95573	-4.47536	0	-1.4695	-5.27684
2020-04-20	-8.74224	-8.65869	-11.1336	-3.69352	-20.4125	-0.158767	-23.6139	-6.37601	-9.11496	-16.6228	-7.35978	-0.845787	-7.70855	-15.1637	-6.76704	-6.70022	-6.84504	-2.44305	-6.10036	-7.52377	-10.9716	-8.27219	-7.00704	0	-1.92129	-8.16626
2020-04-21	-8.14895	-9.72775	-11.1069	-3.55109	-18.6242	-0.218581	-23.354	-7.46217	-8.79882	-11.1999	-6.24157	-3.02112	-21.8658	-15.7291	-6.49767	-5.72077	-6.38661	-4.13204	-4.71721	-5.81324	-11.8343	-8.5444	-6.72126	0	-1.65753	-8.443
2020-04-22	-8.88833	-9.37485	-10.5496	-3.71345	-14.6866	-0.741473	-21.3141	-6.43264	-5.91928	-11.0599	-7.226	-4.38572	-20.1741	-17.7882	-6.2671	-5.33587	-6.68181	-4.75619	-5.30691	-7.22538	-9.5156	-8.73618	-6.58248	-2.2776	-2.09951	-8.28155
2020-04-23	-9.90945	-9.50656	-9.59854	-4.54425	-10.2001	-1.12442	-17.5752	-6.98413	-4.84261	-10.8699	-7.77191	-5.14718	-21.3547	-18.6468	-6.05417	-5.1944	-7.22904	-5.20202	-5.73519	-8.39722	-11.1769	-9.13572	-6.43026	-6.8146	-2.57688	-8.48088
2020-04-24	-7.78794	-9.99605	-10.3964	-5.21186	-11.3419	-2.32928	-18.7975	-6.24208	-6.35907	-9.36814	-7.58323	-1.66731	-19.0755	-17.8409	-6.38338	-4.89949	-7.37636	-5.99673	-5.8915	-8.16831	-10.4118	-8.90235	-6.45633	-5.51627	-2.15796	-8.24631
2020-04-25	-2.5127	-7.66824	-9.6815	-3.37132	-9.48775	-3.85729	-15.9867	-5.86989	-5.28333	-5.36552	-7.92568	-1.03746	-18.1123	-16.1748	-5.63343	-4.47675	-8.41746	-5.96397	-6.30955	-3.36089	-5.96613	-9.42676	-6.01872	-2.18378	-0.647848	-6.82959
2020-04-26	-4.42608	-6.45806	-7.50224	-2.41533	-5.66929	-2.79284	-19.0684	-6.63621	-5.48539	0	-6.2625	-1.31449	-12.6257	-14.1423	-6.99241	-3.00793	-7.67705	-3.83105	-5.31388	-5.29475	-5.25244	-9.5614	-6.63149	-1.42572	-0.284246	-6.00285

## Sheet: GNFR_F_RoadTransp
date	AT	BA	BE	BG	BY	CH	CZ	DK	EE	FI	GE	GR	HR	HU	IE	IT	ES	FR	DE	SE	GB	LT	LU	LV	MD	MK	MT	NL	NO	PL	PT	RO	RS	SI	SK	TR	ZZ
2020-02-21	0	0	0	0	0	0	0	0	0	0	0	0	0	0	0	0	0	0	0	0	0	0	0	0	0	0	0	0	0	0	0	0	0	0	0	0	0
2020-02-22	0	0	0	0	0	0	0	0	0	0	0	0	0	0	0	0	0	0	0	0	0	0	0	0	0	0	0	0	0	0	0	0	0	0	0	0	0
2020-02-23	0	0	0	0	0	0	0	0	0	0	0	0	0	0	0	0	0	0	0	0	0	0	0	0	0	0	0	0	0	0	0	0	0	0	0	0	0
2020-02-24	0	0	0	0	0	0	0	0	0	0	0	0	0	0	0	-15	0	0	0	0	0	0	0	0	0	0	0	0	0	0	0	0	0	0	0	0	-0.416667
2020-02-25	0	0	0	0	0	0	0	0	0	0	0	0	0	0	0	-18	0	0	0	0	0	0	0	0	0	0	0	0	0	0	0	0	0	0	0	0	-0.5
2020-02-26	0	0	0	0	0	0	0	0	0	0	0	0	0	0	0	-23	0	0	0	0	0	0	0	0	0	0	0	0	0	0	0	0	0	0	0	0	-0.638889
2020-02-27	0	0	0	0	0	0	0	0	0	0	0	0	0	0	0	-22	0	0	0	0	0	0	0	0	0	0	0	0	0	0	0	0	0	0	0	0	-0.611111
2020-02-28	0	0	0	0	0	0	0	0	0	0	0	0	0	0	0	-20	0	0	0	0	0	0	0	0	0	0	0	0	0	0	0	0	0	0	0	0	-0.555556
2020-02-29	0	0	0	0	0	0	0	0	0	0	0	0	0	0	0	-16	0	0	0	0	0	0	0	0	0	0	0	0	0	0	0	0	0	0	0	0	-0.444444
2020-03-01	0	0	0	0	0	0	0	0	0	0	0	0	0	0	0	-26	0	0	0	0	0	0	0	0	0	0	0	0	0	0	0	0	0	0	0	0	-0.722222
2020-03-02	0	0	0	0	0	0	0	0	0	0	0	0	0	0	0	-25	0	0	0	0	0	0	0	0	0	0	0	0	0	0	0	0	0	0	0	0	-0.694444
2020-03-03	0	0	0	0	0	0	0	0	0	0	0	0	0	0	0	-21	0	0	0	0	0	0	0	0	0	0	0	0	0	0	0	0	0	0	0	0	-0.583333
2020-03-04	0	0	0	0	0	0	0	0	0	0	0	0	0	0	0	-19	0	0	0	0	0	0	0	0	0	0	0	0	0	0	0	0	0	0	0	0	-0.527778
2020-03-05	0	0	0	0	0	0	0	0	0	0	0	0	0	0	0	-28	0	0	0	0	0	0	0	0	0	0	0	0	0	0	0	0	0	0	0	0	-0.777778
2020-03-06	-2	0	0	0	0	-8	-1	-2	0	-6	0	-1	0	0	0	-29	0	-1	-7	-1	0	0	0	0	0	0	0	-1	0	0	0	0	0	0	-5	0	-1.77778
2020-03-07	-3	-3	0	0	0	-9	-1	0	0	0	0	-6	-2	0	-4	-24	0	0	-2	0	-1	0	0	0	0	-9	-1	0	0	0	0	0	0	0	-2	0	-1.86111
2020-03-08	0	0	-2	0	0	0	0	-1	0	0	0	-7	0	0	-4	-27	0	-2	0	-6	0	0	0	0	0	0	-3	-3	-9	0	0	0	0	0	0	0	-1.77778
2020-03-09	-3	0	-1	-8	0	-8	-2	-3	0	-7	-4	-10	0	0	-6	-42	0	-5	-5	-5	-3	0	-3	0	-2	0	0	-4	-2	0	0	-1	0	0	-2	0	-3.5
2020-03-10	-3	0	-4	-10	0	-10	-2	-7	0	-9	-2	-5	0	0	-3	-51	-1	-6	-8	-6	-4	0	-5	0	-3	-1	-2	-6	-7	0	0	-2	0	0	-11	0	-4.66667
2020-03-11	-8	0	-4	-6	0	-6	-17	-10	-2	-10	-4	-13	0	0	-9	-57	-9	-5	-7	-7	-6	-32	-4	-1	0	-11	0	-8	-9	-2	-1	-9	0	0	-22	0	-7.75
2020-03-12	-9	0	-7	-2	0	-11	-18	-36	-3	-13	-9	-17	0	0	-14	-67	-16	-7	-9	-16	-8	-6	-6	-3	-5	-15	-9	-12	-20	-21	-11	-16	0	-5	-24	0	-11.5278
2020-03-13	-20	-11	-16	-9	0	-15	-26	-48	-17	-26	-11	-26	-11	-9	-30	-71	-32	-8	-15	-19	-9	-18	-12	-18	-17	-24	-22	-26	-39	-34	-24	-18	-4	-29	-44	0	-21.0556
2020-03-14	-34	-15	-34	-28	-8	-26	-26	-36	-26	-27	-12	-35	-22	-8	-34	-76	-52	-16	-19	-13	-15	-27	-16	-21	-14	-30	-26	-28	-37	-39	-33	-22	-13	-30	-50	-4	-26.4444
2020-03-15	-43	-18	-34	-47	-2	-16	-31	-50	-23	-32	-12	-48	-25	-17	-35	-80	-71	-21	-16	-30	-16	-19	-8	-6	-30	-48	-36	-33	-54	-52	-46	-32	-16	-28	-56	-16	-31.8611
2020-03-16	-56	-20	-43	-42	0	-30	-50	-52	-38	-34	-25	-51	-35	-28	-45	-74	-71	-39	-25	-25	-16	-42	-32	-27	-27	-34	-35	-49	-49	-52	-51	-36	-26	-53	-58	-14	-38.4444
2020-03-17	-66	-26	-46	-48	-3	-42	-56	-55	-39	-44	-28	-52	-41	-36	-62	-76	-74	-61	-35	-32	-27	-44	-44	-33	-46	-40	-39	-54	-53	-53	-56	-40	-34	-55	-60	-22	-45.0556
2020-03-18	-65	-34	-56	-51	0	-45	-55	-61	-47	-47	-33	-59	-45	-40	-52	-77	-76	-76	-39	-37	-34	-48	-56	-42	-51	-43	-38	-55	-55	-52	-57	-40	-42	-56	-61	-33	-48.8333
2020-03-19	-67	-36	-67	-50	-4	-51	-58	-58	-38	-48	-33	-60	-51	-43	-54	-78	-80	-78	-46	-35	-37	-51	-64	-36	-53	-48	-51	-61	-56	-54	-68	-44	-44	-57	-60	-38	-51.5833
2020-03-20	-68	-45	-71	-50	-1	-56	-59	-62	-43	-52	-32	-61	-57	-45	-57	-78	-80	-80	-52	-37	-40	-52	-68	-40	-58	-53	-47	-61	-55	-58	-73	-42	-49	-59	-63	-41	-54.0278
2020-03-21	-75	-54	-67	-54	-12	-62	-66	-55	-39	-51	-39	-61	-61	-47	-59	-80	-84	-82	-59	-28	-46	-54	-72	-32	-61	-56	-59	-54	-42	-59	-71	-43	-47	-51	-70	-46	-55.5
2020-03-22	-76	-68	-63	-62	-18	-66	-65	-60	-35	-52	-45	-63	-56	-55	-53	-87	-87	-84	-58	-33	-46	-55	-68	-31	-72	-64	-65	-57	-57	-66	-74	-55	-69	-64	-69	-55	-59.8056
2020-03-23	-71	-64	-70	-62	-9	-59	-60	-60	-43	-54	-47	-74	-77	-58	-61	-81	-81	-82	-56	-38	-53	-54	-74	-40	-60	-64	-52	-65	-58	-59	-74	-61	-68	-66	-66	-48	-60.25
2020-03-24	-71	-68	-69	-65	-7	-58	-59	-60	-44	-54	-49	-73	-82	-57	-62	-81	-81	-82	-56	-37	-64	-55	-73	-39	-61	-64	-53	-65	-59	-58	-74	-60	-75	-68	-63	-54	-61.1111
2020-03-25	-73	-67	-69	-63	-2	-59	-58	-59	-44	-54	-48	-86	-82	-58	-63	-82	-82	-83	-56	-36	-68	-55	-74	-36	-61	-64	-60	-64	-58	-62	-74	-66	-74	-70	-65	-55	-61.9444
2020-03-26	-72	-67	-72	-61	-3	-61	-60	-59	-44	-55	-50	-76	-82	-55	-65	-83	-82	-83	-57	-35	-70	-55	-75	-36	-60	-65	-56	-66	-56	-62	-75	-68	-71	-72	-63	-55	-61.8611
2020-03-27	-70	-66	-70	-59	-3	-58	-56	-61	-48	-58	-49	-77	-79	-48	-66	-82	-83	-84	-56	-35	-71	-55	-74	-36	-63	-64	-55	-64	-57	-62	-75	-65	-70	-65	-62	-57	-61.1944
2020-03-28	-66	-63	-67	-57	-3	-53	-49	-56	-41	-54	-48	-74	-74	-52	-75	-82	-86	-83	-53	-29	-74	-46	-67	-23	-64	-73	-52	-61	-50	-56	-74	-67	-64	-45	-54	-63	-58.2778
2020-03-29	-71	-59	-76	-58	-7	-68	-61	-60	-51	-59	-53	-76	-74	-53	-78	-87	-88	-87	-68	-36	-75	-63	-78	-48	-68	-69	-57	-68	-57	-71	-78	-72	-72	-54	-61	-71	-64.7778
2020-03-30	-71	-61	-72	-55	-17	-62	-58	-59	-52	-57	-56	-68	-79	-59	-76	-81	-84	-83	-56	-39	-73	-60	-74	-46	-64	-55	-57	-68	-53	-64	-78	-65	-67	-72	-62	-58	-62.8056
2020-03-31	-69	-65	-71	-59	-14	-53	-59	-54	-51	-59	-61	-70	-77	-56	-74	-79	-84	-82	-53	-37	-72	-58	-73	-45	-65	-60	-54	-64	-52	-63	-75	-68	-68	-65	-60	-61	-61.9444
2020-04-01	-67	-63	-69	-64	-20	-52	-55	-58	-49	-56	-59	-72	-76	-54	-75	-79	-84	-81	-53	-38	-73	-62	-72	-47	-62	-67	-50	-64	-54	-64	-76	-66	-70	-62	-60	-62	-62.0833
2020-04-02	-68	-56	-73	-60	-21	-53	-56	-61	-52	-59	-63	-70	-74	-53	-76	-79	-84	-82	-54	-43	-73	-62	-73	-50	-62	-60	-55	-67	-58	-64	-74	-66	-68	-61	-59	-64	-62.5833
2020-04-03	-69	-58	-72	-56	-24	-54	-58	-61	-57	-62	-59	-73	-73	-51	-76	-79	-84	-82	-57	-41	-72	-60	-76	-48	-64	-60	-58	-65	-53	-65	-75	-63	-66	-61	-60	-64	-62.6667
2020-04-04	-67	-55	-64	-64	-20	-51	-51	-53	-44	-55	-61	-78	-68	-43	-74	-80	-86	-80	-52	-32	-72	-54	-67	-37	-64	-74	-56	-57	-46	-63	-75	-65	-69	-51	-52	-70	-59.7222
2020-04-05	-64	-56	-60	-65	-25	-48	-46	-49	-43	-57	-56	-80	-66	-44	-79	-86	-89	-82	-47	-37	-70	-49	-65	-26	-67	-75	-54	-52	-52	-68	-82	-72	-93	-51	-55	-76	-60.7222
2020-04-06	-64	-53	-69	-56	-18	-51	-51	-52	-43	-56	-61	-72	-71	-51	-74	-78	-83	-81	-49	-35	-72	-51	-71	-37	-60	-55	-51	-63	-46	-62	-77	-64	-64	-58	-54	-65	-58.8333
2020-04-07	-63	-51	-67	-53	-16	-50	-45	-51	-39	-56	-63	-72	-70	-49	-71	-78	-83	-80	-50	-37	-69	-49	-71	-34	-59	-50	-52	-61	-44	-60	-74	-64	-65	-56	-46	-65	-57.3056
2020-04-08	-63	-51	-66	-51	-18	-51	-44	-51	-38	-54	-62	-69	-70	-49	-72	-78	-82	-80	-49	-36	-70	-50	-70	-35	-59	-63	-48	-58	-52	-60	-72	-63	-65	-57	-59	-65	-57.7778
2020-04-09	-63	-50	-67	-48	-21	-50	-42	-62	-42	-54	-62	-67	-68	-44	-73	-78	-88	-80	-49	-37	-70	-53	-72	-40	-58	-60	-49	-61	-58	-58	-78	-63	-62	-57	-61	-63	-58.5556
2020-04-10	-66	-52	-67	-48	-23	-61	-58	-65	-53	-69	-57	-66	-70	-70	-76	-77	-92	-81	-69	-54	-75	-53	-73	-47	-62	-59	-60	-60	-58	-61	-85	-59	-58	-59	-80	-61	-63.4444
2020-04-11	-62	-52	-60	-46	-27	-47	-37	-52	-43	-54	-57	-65	-65	-43	-70	-78	-84	-79	-48	-36	-70	-59	-65	-33	-64	-93	-51	-51	-55	-64	-77	-59	-91	-47	-56	-90	-59.1667
2020-04-12	-63	-48	-61	-51	-27	-49	-38	-47	-58	-70	-56	-67	-73	-53	-82	-88	-89	-82	-47	-43	-71	-67	-68	-44	-67	-92	-55	-54	-52	-75	-81	-68	-91	-48	-61	-90	-63.2222
2020-04-13	-78	-52	-80	-49	-25	-61	-73	-65	-47	-68	-58	-64	-80	-75	-80	-91	-85	-88	-73	-61	-78	-76	-85	-62	-60	-53	-50	-75	-63	-86	-80	-62	-57	-69	-80	-55	-67.8889
2020-04-14	-62	-61	-70	-52	-26	-52	-50	-53	-50	-58	-55	-65	-76	-54	-71	-77	-79	-78	-52	-38	-69	-59	-71	-50	-61	-60	-51	-64	-52	-65	-73	-62	-66	-65	-56	-59	-60.0556
2020-04-15	-58	-52	-66	-53	-28	-49	-44	-51	-46	-57	-52	-65	-68	-51	-71	-76	-81	-78	-49	-35	-69	-59	-69	-44	-56	-59	-49	-59	-47	-61	-73	-58	-60	-55	-51	-63	-57.2778
2020-04-16	-57	-46	-67	-43	-28	-51	-43	-50	-49	-58	-60	-61	-67	-50	-66	-76	-80	-78	-48	-37	-70	-56	-68	-46	-52	-54	-50	-60	-48	-60	-75	-58	-56	-55	-50	-58	-56.4167
2020-04-17	-58	-56	-66	-62	-26	-50	-43	-50	-46	-59	-64	-69	-67	-48	-68	-76	-81	-79	-49	-36	-71	-53	-68	-45	-55	-58	-49	-59	-44	-61	-73	-67	-60	-55	-53	-57	-57.8056
2020-04-18	-54	-48	-67	-59	-29	-46	-31	-43	-37	-52	-72	-67	-57	-39	-65	-77	-84	-78	-46	-26	-71	-47	-64	-33	-65	-92	-48	-57	-30	-57	-70	-65	-92	-37	-45	-90	-56.6667
2020-04-19	-66	-54	-63	-60	-39	-46	-47	-43	-37	-55	-74	-78	-59	-51	-66	-84	-89	-81	-44	-31	-66	-49	-65	-32	-76	-91	-50	-49	-32	-67	-75	-83	-92	-45	-62	-89	-60.8333
2020-04-20	-56	-54	-65	-73	-27	-51	-44	-42	-39	-53	-78	-78	-69	-51	-65	-79	-80	-78	-44	-32	-68	-54	-65	-41	-76	-93	-52	-60	-37	-56	-77	-85	-93	-58	-52	-53	-60.5
2020-04-21	-54	-55	-64	-59	-23	-50	-42	-40	-34	-50	-78	-68	-68	-50	-63	-77	-80	-77	-44	-29	-67	-50	-64	-37	-65	-62	-47	-60	-34	-55	-74	-69	-59	-53	-52	-54	-55.75
2020-04-22	-54	-48	-63	-52	-20	-46	-41	-40	-34	-51	-77	-69	-66	-50	-63	-76	-80	-76	-43	-30	-67	-49	-62	-33	-61	-62	-46	-56	-36	-55	-73	-63	-59	-51	-52	-51	-54.3056
2020-04-23	-54	-43	-63	-48	-19	-47	-41	-40	-37	-53	-75	-66	-65	-50	-64	-75	-80	-76	-42	-31	-67	-47	-62	-35	-57	-49	-48	-56	-38	-53	-73	-62	-57	-50	-51	-87	-54.4722
2020-04-24	-56	-49	-64	-48	-19	-46	-41	-46	-42	-57	-76	-64	-65	-49	-64	-73	-79	-77	-46	-34	-66	-47	-62	-38	-60	-52	-47	-56	-42	-54	-73	-60	-51	-51	-53	-88	-55.4167
2020-04-25	-52	-43	-58	-42	-20	-44	-35	-40	-33	-52	-73	-59	-57	-42	-58	-83	-83	-76	-41	-24	-65	-37	-57	-28	-64	-60	-43	-51	-29	-52	-71	-60	-90	-34	-49	-90	-52.6389
2020-04-26	-50	-49	-54	-51	-24	-47	-32	-45	-35	-56	-70	-61	-54	-42	-67	-81	-82	-77	-39	-31	-64	-39	-58	-31	-71	-91	-46	-46	-37	-53	-74	-66	-90	-38	-49	-88	-55.2222

## Sheet: GNFR_H_Aviation
date	BE	NL	LU	CH	IT	ES	FR	DE	SE	GB	AT	CZ	DK	NO	FI	EE	LV	LI	RO	BG	GR	MK	HR	SI	HU	SK	ZZ
2020-02-21	0	0	0	0	0	0	0	0	0	0	0	0	0	0	0	0	0	0	0	0	0	0	0	0	0	0	0
2020-02-22	0	0	0	0	0	0	0	0	0	0	0	0	0	0	0	0	0	0	0	0	0	0	0	0	0	0	0
2020-02-23	0	0	0	0	0	0	0	0	0	0	0	0	0	0	0	0	0	0	0	0	0	0	0	0	0	0	0
2020-02-24	0	0	0	0	0	0	0	0	0	0	0	0	0	0	0	0	0	0	0	0	0	0	0	0	0	0	0
2020-02-25	0	0	0	0	0	0	0	0	0	0	0	0	0	0	0	0	0	0	0	0	0	0	0	0	0	0	0
2020-02-26	0	0	0	0	0	0	0	0	0	0	0	0	0	0	0	0	0	0	0	0	0	0	0	0	0	0	0
2020-02-27	0	0	0	0	0	0	0	0	0	0	0	0	0	0	0	0	0	0	0	0	0	0	0	0	0	0	0
2020-02-28	0	0	0	0	0	0	0	0	0	0	0	0	0	0	0	0	0	0	0	0	0	0	0	0	0	0	0
2020-02-29	0	0	0	0	0	0	0	0	0	0	0	0	0	0	0	0	0	0	0	0	0	0	0	0	0	0	0
2020-03-01	0	0	0	0	0	0	0	0	0	0	0	0	0	0	0	0	0	0	0	0	0	0	0	0	0	0	0
2020-03-02	0	0	0	0	0	0	0	0	0	0	0	0	0	0	0	0	0	0	0	0	0	0	0	0	0	0	0
2020-03-03	0	0	0	0	0	0	0	0	0	0	0	0	0	0	0	0	0	0	0	0	0	0	0	0	0	0	0
2020-03-04	0	0	0	0	0	0	0	0	0	0	0	0	0	0	0	0	0	0	0	0	0	0	0	0	0	0	0
2020-03-05	0	0	0	0	0	0	0	0	0	0	0	0	0	0	0	0	0	0	0	0	0	0	0	0	0	0	0
2020-03-06	0	0	0	0	0	0	0	0	0	0	0	0	0	0	0	0	0	0	0	0	0	0	0	0	0	0	0
2020-03-07	-22.1518	-4.79638	-14.3065	0	-13.0163	0	-1.20664	-3.51117	-7.12121	0	-10.9792	-19.39	-24.4901	-37.1855	-6.26495	-29.4118	0	0	0	0	0	0	0	-52.2059	0	-48.2353	-11.3182
2020-03-08	-11.8959	-7.53846	-16.0494	0	-22.0745	-1.5534	-8.17308	-16.8992	-14.2424	-6.08424	-4.74777	-3.08642	-8.59599	-1.76991	-5.69106	-26	0	-12.963	-5.55556	0	0	-10.5263	-4.44444	-50	0	-44	-10.842
2020-03-09	-8.17844	-5.84615	0	0	-30.3191	0	-16.5064	-19.0698	-8.78788	-7.02028	-16.9139	-8.02469	-2.86533	0	0	-6	0	-3.7037	-4.86111	0	-4.20561	0	0	-40.625	0	-48	-8.88183
2020-03-10	-25.6506	-13.2308	-23.4568	0	-48.4043	-7.37864	-22.7564	-26.3566	-14.2424	-11.3885	-29.0801	-28.3951	-14.0401	-2.0649	-1.62602	-6	0	-7.40741	-17.3611	-10.2941	-15.8879	-21.0526	-8.88889	-59.375	-10.9375	-64	-18.8183
2020-03-11	-21.1896	-14.3077	-14.8148	0	-67.5532	-13.5922	-21.1538	-26.3566	-12.7273	-13.5725	-28.4866	-29.0123	-12.6074	0	-0.813008	-14	0	-9.25926	-15.9722	-13.2353	-11.215	-5.26316	-2.22222	-65.625	-6.25	-68	-18.7396
2020-03-12	-20.4461	-10.1538	-19.7531	0	-71.2766	-8.34951	-19.5513	-25.5814	-15.4545	-8.73635	-22.5519	-18.5185	-10.3152	0	0	-6	0	-16.6667	-18.0556	-20.5882	-14.486	-31.5789	0	-46.875	-6.25	-60	-18.1226
2020-03-13	-11.5242	-10.6154	-6.17284	0	-76.5957	-7.76699	-15.8654	-26.2016	-16.3636	-8.42434	-17.8042	-12.963	-10.8883	-9.14454	-2.43902	-12	0	-9.25926	-11.1111	-11.7647	-4.6729	0	0	-43.75	0	-100	-16.3587
2020-03-14	-31.3361	-15.1131	-23.0211	0	-81.2265	-13.6493	-16.4781	-24.3046	-21.0606	-4.01028	-31.9253	-44.0813	-36.9628	-45.8615	-17.2645	-34.1176	-7.92839	-12.854	-15.8497	-8.3045	-12.5893	0	-8.49673	-59.5588	-7.16912	-100	-25.8909
2020-03-15	-30.855	-17.2308	-27.1605	0	-83.7766	-18.4466	-29.0064	-41.5504	-25.7576	-12.6365	-28.1899	-38.8889	-28.0802	-20.059	-18.2927	-36	-7.6087	-27.7778	-27.7778	-20.5882	-13.0841	-21.0526	-17.7778	-62.5	-3.125	-100	-29.124
2020-03-16	-40.1487	-20.9231	-35.8025	-17.341	-84.8404	-30.4854	-41.3462	-48.062	-42.1212	-20.7488	-50.4451	-70.3704	-48.9971	-39.528	-28.4553	-34	-11.9565	-48.1481	-33.3333	-33.8235	-30.3738	-5.26316	-20	-56.25	-16.4062	-100	-38.8142
2020-03-17	-54.6468	-38	-45.679	-34.6821	-87.234	-48.7379	-53.6859	-57.6744	-51.2121	-38.8456	-75.3709	-78.3951	-64.1834	-51.6224	-54.878	-80	-94.5652	-75.9259	-42.3611	-45.5882	-42.5234	-42.1053	-33.3333	-96.875	-42.9688	-100	-58.8882
2020-03-18	-65.4275	-56.1538	-50.6173	-46.8208	-88.2979	-66.4078	-55.2885	-57.6744	-60	-45.5538	-74.7774	-77.1605	-72.7794	-56.6372	-58.5366	-90	-95.6522	-83.3333	-52.7778	-42.6471	-46.729	-47.3684	-31.1111	-100	-50	-100	-64.2981
2020-03-19	-68.0297	-53.8462	-62.963	-53.1792	-87.234	-74.7573	-58.3333	-67.2868	-62.4242	-46.9579	-87.2404	-80.2469	-71.0602	-60.767	-65.0407	-86	-97.8261	-75.9259	-58.3333	-58.8235	-50.9346	-100	-42.2222	-100	-48.4375	-100	-69.9181
2020-03-20	-68.7732	-54.6154	-54.321	-45.0867	-87.234	-79.2233	-59.9359	-65.5814	-62.4242	-51.014	-86.9436	-89.5062	-76.2178	-61.3569	-68.2927	-88	-96.7391	-85.1852	-53.4722	-44.1176	-49.5327	-100	-44.4444	-100	-50	-100	-70.0776
2020-03-21	-79.8819	-61.086	-66.594	-58.5175	-85.9199	-80.5825	-65.8748	-64.4323	-74.6881	-50.2615	-89.1779	-90.5592	-81.7967	-76.4012	-68.4362	-92.9412	-97.4425	-80.3922	-69.7712	-46.3668	-57.1193	-100	-58.1699	-100	-57.7206	-100	-75.159
2020-03-22	-81.4126	-64.9231	-70.3704	-61.8497	-88.8298	-83.301	-68.9103	-72.7132	-74.5455	-59.7504	-91.9881	-91.9753	-85.3868	-75.5162	-73.5772	-88	-100	-85.1852	-65.2778	-55.8824	-63.0841	-94.7368	-66.6667	-96.875	-63.2812	-100	-77.8476
2020-03-23	-88.8476	-77.8462	-82.716	-79.1908	-87.766	-90.6796	-85.4167	-82.7907	-82.1212	-67.2387	-94.0653	-95.679	-93.6963	-75.8112	-81.7073	-92	-100	-92.5926	-71.5278	-66.1765	-72.4299	-100	-62.2222	-100	-66.4062	-100	-84.1895
2020-03-24	-87.3606	-80.4615	-86.4198	-87.8613	-88.8298	-89.5146	-86.2179	-85.8915	-83.0303	-70.8268	-96.1424	-95.679	-92.2636	-79.056	-83.3333	-98	-100	-87.037	-79.1667	-82.3529	-81.7757	-100	-73.3333	-100	-74.2188	-100	-87.2605
2020-03-25	-90.7063	-80.4615	-93.8272	-84.3931	-88.5638	-89.5146	-85.8974	-82.6357	-84.5455	-73.791	-96.7359	-95.679	-92.8367	-75.5162	-83.7398	-96	-100	-100	-88.8889	-85.2941	-82.243	-100	-68.8889	-100	-79.6875	-96	-88.3018
2020-03-26	-89.9628	-80.4615	-93.8272	-87.2832	-87.766	-90.4854	-86.2179	-84.031	-83.9394	-70.9828	-95.2522	-93.2099	-94.2693	-77.2861	-86.5854	-96	-98.913	-98.1481	-89.5833	-77.9412	-84.1121	-100	-80	-100	-89.8438	-100	-89.0808
2020-03-27	-86.9888	-81.6923	-93.8272	-79.7688	-88.8298	-88.3495	-87.9808	-85.1163	-81.8182	-70.9828	-95.8457	-90.7407	-93.6963	-75.5162	-82.1138	-96	-100	-94.4444	-90.2778	-79.4118	-82.243	-100	-71.1111	-100	-85.1562	-100	-87.7658
2020-03-28	-91.253	-84.4344	-89.833	-87.7593	-88.1101	-92.6899	-87.9336	-81.5777	-89.3048	-68.6152	-95.8108	-97.0951	-93.9322	-91.324	-86.6093	-97.6471	-100	-97.8214	-90.1961	-79.2388	-82.9577	-100	-86.9281	-100	-92.6471	-100	-90.5276
2020-03-29	-93.3086	-89.3846	-97.5309	-84.3931	-89.0957	-93.0097	-91.0256	-86.2016	-86.3636	-76.131	-96.7359	-96.9136	-94.8424	-80.236	-87.3984	-100	-100	-98.1481	-90.9722	-86.7647	-88.785	-100	-91.1111	-100	-91.4062	-100	-91.9138
2020-03-30	-92.9368	-91.3846	-96.2963	-85.5491	-89.8936	-94.9515	-93.2692	-88.2171	-88.4848	-82.6833	-96.1424	-98.1481	-94.2693	-78.7611	-89.0244	-98	-98.913	-100	-92.3611	-82.3529	-84.1121	-100	-82.2222	-96.875	-89.8438	-100	-91.7189
2020-03-31	-94.4238	-90.4615	-91.358	-92.4855	-90.9574	-92.8155	-93.75	-88.062	-89.697	-83.3073	-97.0326	-98.1481	-94.5559	-79.351	-89.4309	-96	-98.913	-98.1481	-94.4444	-89.7059	-85.0467	-100	-88.8889	-96.875	-92.1875	-100	-92.5402
2020-04-01	-94.4238	-90.9231	-93.8272	-88.4393	-89.8936	-94.7573	-93.2692	-88.8372	-89.697	-86.8955	-95.8457	-98.7654	-94.5559	-80.236	-90.6504	-98	-98.913	-98.1481	-93.75	-88.2353	-85.9813	-100	-84.4444	-93.75	-89.8438	-96	-92.2339
2020-04-02	-95.539	-91.0769	-87.6543	-91.3295	-90.1596	-94.5631	-94.8718	-85.2713	-91.2121	-85.1794	-96.7359	-96.2963	-95.702	-79.351	-92.2764	-94	-97.8261	-100	-93.0556	-85.2941	-85.9813	-100	-91.1111	-96.875	-92.9688	-100	-92.4743
2020-04-03	-92.5651	-90.1538	-95.0617	-89.5954	-90.6915	-94.3689	-92.9487	-87.4419	-90	-85.3354	-96.7359	-98.7654	-94.2693	-78.4661	-91.0569	-98	-100	-98.1481	-92.3611	-80.8824	-86.4486	-100	-82.2222	-96.875	-89.0625	-100	-91.9791
2020-04-04	-95.6265	-89.1403	-88.3805	-90.4794	-88.7359	-96.1165	-92.0814	-85.5905	-95.0089	-82.9311	-96.8581	-97.8214	-95.6177	-91.324	-94.2611	-95.2941	-100	-95.6427	-93.4641	-86.1592	-87.3557	-100	-89.5425	-96.3235	-95.4044	-100	-93.0446
2020-04-05	-95.1673	-91.2308	-98.7654	-87.8613	-89.6277	-95.7282	-94.7115	-86.8217	-91.5152	-85.0234	-97.3294	-97.5309	-95.4155	-83.1858	-93.9024	-100	-100	-98.1481	-95.8333	-86.7647	-87.8505	-100	-97.7778	-100	-93.75	-100	-93.9977
2020-04-06	-94.052	-92.1538	-92.5926	-90.7514	-90.4255	-97.4757	-93.5897	-88.2171	-93.6364	-90.1716	-97.6261	-100	-95.1289	-80.236	-91.4634	-96	-98.913	-100	-96.5278	-85.2941	-86.4486	-94.7368	-88.8889	-96.875	-91.4062	-100	-93.1773
2020-04-07	-95.9108	-92.6154	-92.5926	-96.5318	-90.6915	-94.5631	-94.2308	-88.5271	-93.9394	-90.4836	-96.7359	-99.3827	-96.2751	-80.236	-92.2764	-96	-100	-100	-100	-92.6471	-87.8505	-100	-93.3333	-96.875	-93.75	-100	-94.4403
2020-04-08	-95.1673	-92.7692	-88.8889	-93.6416	-90.4255	-95.3398	-93.109	-88.062	-94.2424	-87.8315	-96.1424	-99.3827	-95.9885	-81.7109	-92.2764	-98	-100	-100	-98.6111	-85.2941	-82.7103	-100	-93.3333	-96.875	-90.625	-96	-93.3241
2020-04-09	-96.2825	-92.3077	-87.6543	-94.7977	-90.4255	-94.5631	-94.0705	-87.1318	-94.5455	-87.8315	-97.3294	-98.7654	-96.8481	-84.0708	-91.4634	-94	-98.913	-100	-97.9167	-88.2353	-87.3832	-100	-93.3333	-96.875	-93.75	-100	-93.7882
2020-04-10	-95.539	-92.6154	-93.8272	-90.7514	-91.2234	-96.699	-93.2692	-88.062	-96.3636	-88.4555	-98.2196	-98.7654	-97.4212	-85.8407	-92.2764	-100	-100	-100	-97.2222	-80.8824	-85.514	-100	-88.8889	-96.875	-89.0625	-100	-93.7605
2020-04-11	-96.9386	-90.5882	-85.4757	-94.5597	-91.5519	-97.4872	-92.4585	-87.9617	-97.861	-88.8043	-97.5563	-98.5476	-97.3032	-95.8355	-94.7394	-95.2941	-100	-100	-99.183	-93.0796	-86.2562	-100	-97.3856	-100	-94.4853	-100	-95.1289
2020-04-12	-96.6543	-93.8462	-96.2963	-89.5954	-95.2128	-96.699	-94.2308	-90.3876	-96.0606	-88.6115	-97.9228	-98.1481	-97.4212	-85.5457	-93.9024	-100	-100	-100	-99.3056	-89.7059	-88.3178	-100	-95.5556	-100	-94.5312	-100	-95.3058
2020-04-13	-97.026	-94.4615	-96.2963	-91.9075	-94.4149	-97.2816	-95.0321	-89.6124	-95.7576	-90.0156	-98.5163	-99.3827	-96.5616	-80.531	-92.6829	-98	-100	-100	-97.2222	-83.8235	-87.3832	-100	-95.5556	-100	-93.75	-100	-94.8159
2020-04-14	-96.6543	-94.3077	-91.358	-96.5318	-93.0851	-96.699	-94.8718	-90.3876	-95.1515	-91.2637	-96.4392	-100	-96.5616	-80.826	-92.2764	-94	-98.913	-100	-100	-92.6471	-88.785	-94.7368	-93.3333	-96.875	-94.5312	-100	-94.6244
2020-04-15	-95.9108	-92.1538	-87.6543	-93.0636	-91.7553	-96.1165	-93.5897	-89.3023	-94.8485	-89.8596	-96.4392	-99.3827	-95.9885	-82.3009	-92.2764	-98	-97.8261	-100	-99.3056	-86.7647	-84.1121	-100	-91.1111	-93.75	-91.4062	-100	-93.5738
2020-04-16	-97.3978	-91.6923	-86.4198	-94.2197	-93.883	-96.1165	-94.391	-88.2171	-95.4545	-90.0156	-96.7359	-98.1481	-97.1347	-82.5959	-91.8699	-94	-98.913	-100	-99.3056	-91.1765	-87.8505	-100	-93.3333	-96.875	-94.5312	-100	-94.2414
2020-04-17	-95.539	-92	-93.8272	-89.5954	-92.8191	-96.3107	-94.0705	-88.6822	-94.2424	-88.6115	-96.1424	-98.7654	-96.5616	-81.1209	-91.0569	-98	-100	-100	-97.9167	-89.7059	-85.9813	-100	-93.3333	-96.875	-91.4062	-100	-93.9448
2020-04-18	-97.8133	-89.5023	-89.833	-93.8796	-95.6195	-96.8018	-92.4585	-86.1377	-96.0784	-88.0701	-97.2072	-97.8214	-96.2919	-93.7533	-94.2611	-95.2941	-98.7212	-100	-99.183	-93.0796	-90.1045	-100	-97.3856	-100	-96.3235	-100	-95.2162
2020-04-19	-95.9108	-92.6154	-96.2963	-90.1734	-95.4787	-97.6699	-94.391	-88.5271	-94.2424	-87.5195	-97.9228	-98.7654	-97.1347	-84.0708	-93.9024	-100	-100	-100	-99.3056	-98.5294	-91.5888	-100	-95.5556	-100	-94.5312	-100	-95.5435
2020-04-20	-95.539	-91.6923	-95.0617	-93.0636	-90.9574	-98.2524	-94.5513	-88.3721	-94.5455	-88.2995	-97.3294	-100	-95.702	-81.1209	-93.0894	-96	-98.913	-100	-97.2222	-86.7647	-85.514	-100	-93.3333	-96.875	-93.75	-100	-94.075
2020-04-21	-96.2825	-92.4615	-92.5926	-94.7977	-92.5532	-96.1165	-94.5513	-89.4574	-95.1515	-90.9516	-96.4392	-99.3827	-95.9885	-81.1209	-92.6829	-96	-100	-100	-97.2222	-94.1176	-86.9159	-100	-93.3333	-96.875	-96.0938	-100	-94.6572
2020-04-22	-97.7695	-90.6154	-87.6543	-94.2197	-93.0851	-96.699	-93.4295	-87.907	-95.1515	-88.7676	-97.3294	-100	-95.702	-81.7109	-93.0894	-98	-97.8261	-100	-99.3056	-91.1765	-86.9159	-100	-93.3333	-100	-94.5312	-100	-94.393
2020-04-23	-96.2825	-90.6154	-86.4198	-94.7977	-92.5532	-96.699	-94.0705	-87.2868	-95.1515	-88.2995	-96.4392	-98.7654	-96.5616	-82.5959	-91.4634	-92	-98.913	-100	-100	-95.5882	-90.6542	-100	-93.3333	-90.625	-94.5312	-100	-93.9864
2020-04-24	-94.052	-90.7692	-91.358	-89.5954	-92.8191	-95.534	-94.8718	-87.1318	-94.5455	-87.8315	-95.8457	-100	-95.702	-81.4159	-92.2764	-98	-100	-100	-97.9167	-91.1765	-85.514	-100	-91.1111	-96.875	-89.8438	-100	-93.6225
2020-04-25	-96.0639	-88.2353	-88.3805	-91.1595	-93.1164	-97.7156	-91.8929	-85.4081	-95.7219	-88.0701	-96.509	-99.2738	-96.2919	-92.7121	-93.7829	-95.2941	-100	-100	-96.732	-91.3495	-87.3557	-100	-97.3856	-96.3235	-98.1618	-100	-94.4975
2020-04-26	-95.539	-91.3846	-95.0617	-88.4393	-92.2872	-97.2816	-94.2308	-86.5116	-93.9394	-87.2075	-96.7359	-98.7654	-96.8481	-83.7758	-93.4959	-100	-100	-100	-98.6111	-92.6471	-88.785	-100	-95.5556	-100	-96.875	-100	-94.7684
